# Supplementary material
Source: PubMed Central journal article supplement (PMC5815113)

## Supplementary Online Content

Yin N, Wu D, Wang Y, et al. Complete philtrum reconstruction on the partial-thickness cross-lip flap by nasolabial muscle tension line group reconstruction in the same stage of flap transfer. *JAMA Facial Plastic Surg*. Published online June 29, 2017.  
doi:10.1001/jamafacial.2017.0296

**eTable.** Information of the Patient Group

**eFigure 1.** A Patient With Secondary Labial Defects of Bilateral Cleft Lip Underwent the Complication of the Necrotic Flap

**eFigure 2.** Secondary Auxiliary Tension Line Group

This supplementary material has been provided by the authors to give readers additional information about their work.

**eTable.** Information of the Patient Group

| <b>Patient No.</b> | <b>Sex</b> | <b>Age</b> | <b>Diagnosis</b>                                | <b>Last 3D scan</b> |
|--------------------|------------|------------|-------------------------------------------------|---------------------|
| 1                  | Female     | 22         | Upper lip defect after hemangioma treatment     | 12 months           |
| 2                  | Male       | 22         | Secondary labial defects of bilateral cleft lip | 12 months           |
| 3                  | Female     | 20         | Secondary labial defects of bilateral cleft lip | 24 months           |
| 4                  | Female     | 13         | Upper lip defects after hemangioma treatment    | 2 months            |
| 5                  | Male       | 13         | Upper lip defects after hemangioma treatment    | 28 months           |
| 6                  | Female     | 12         | Secondary labial defects of bilateral cleft lip | none                |

**eFigure 1.** A Patient With Secondary Labial Defects of Bilateral Cleft Lip Underwent the Complication of the Necrotic Flap

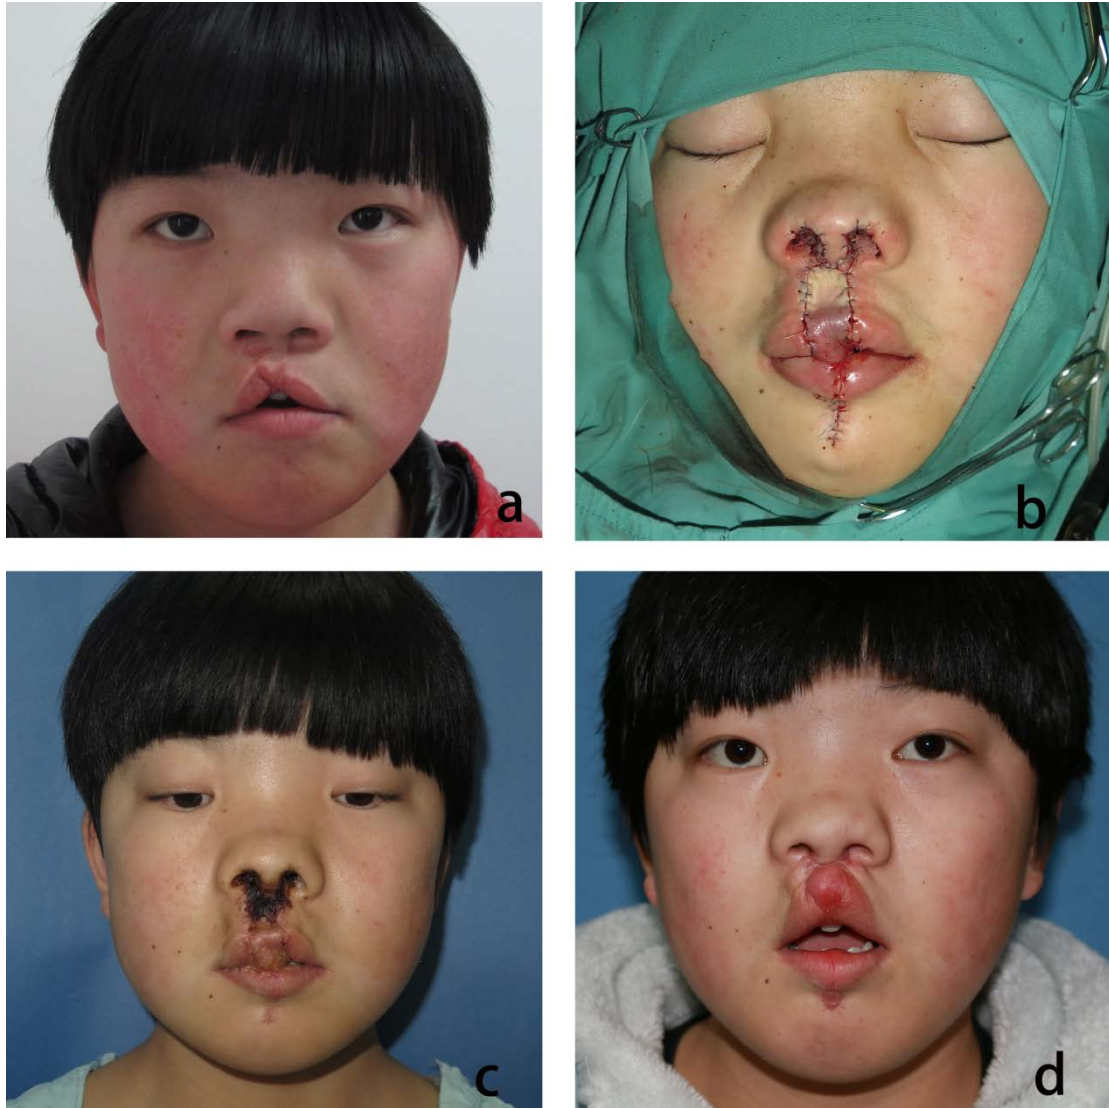

a, preoperative view; b, intraoperative view; c, fourteen-day postoperative view: the flap partial necrosis; d, 12-month postoperative view: severe scar retraction.

**eFigure 2.** Secondary Auxiliary Tension Line Group

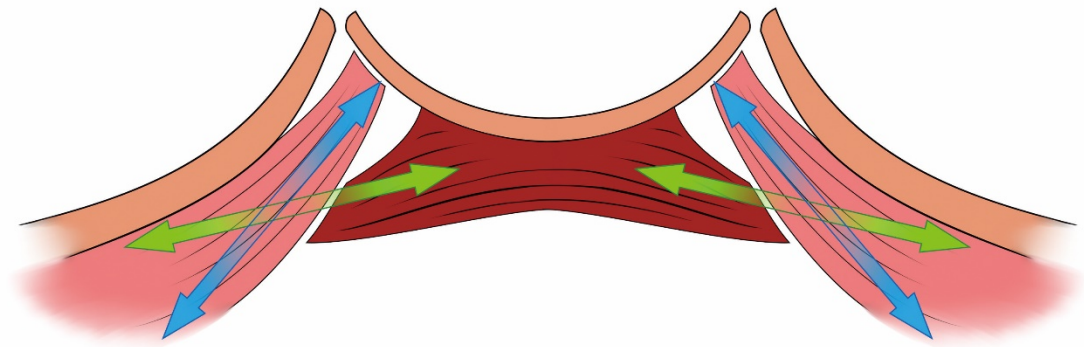

Supplement: jamafacialplastsurg-19-496-s001.pdf [file jamafacialplastsurg-19-496-s001.pdf]
